# Supplementary material for: Energy and Molecules from Photochemical/Photocatalytic Reactions. An Overview
Source: PubMed Central journal article supplement (PMC6272209; doi:10.3390/molecules20011527), 2015-01-16
Supplement: molecules-20-01527-s001.pdf [file molecules-20-01527-s001.pdf]

# Supplementary Materials

## Computational Details

The computational investigation has been carried out in order to recognize the energy change associated to the reaction under consideration. All of the simulations have been carried out with the Gaussian09 Software [1].

Preliminary calculations have been performed using Density Functional Theory (DFT) in order to find out the most stable conformer of the molecule under investigation. Thus, reactants and products have been initially optimized adopting the B3LYP [2–5] functional and the standard 6-31G(d) basis set in the gas phase. To confirm the nature of the stationary points, vibrational frequencies (in the harmonic approximation) were calculated for all of the optimized structures at the same level of theory as geometry optimizations and it was verified that local minima had only real frequencies. In several cases, the reactions had well defined stereochemical outcomes and the corresponding products have been modeled. However, when the stereochemistry of the reagents/products was not dealt with in the original reference or mixture of stereoisomers could be involved, only the most stable isomer was considered for the computational investigation.

For each molecule, the most stable conformer has been used as the starting point for a refinement by adopting a higher level of theory, *viz.* using the composite method G3(MP2)B3 [6] in the gas phase. This approach is particularly advantageous for medium-large systems (as those considered here) and offers a very good performance while limiting the computational cost. This method is a variant of the G3(MP2) theory based on geometries and zero point vibrational energies calculated at the same level as above, that is B3LYP/6-31G(d). The steps required for the calculation of the desired energy values include:

- Optimization at the B3LYP/6-31G(d) level of theory
- Frequency calculation at the B3LYP /6-31G(d) level of theory
- Single point calculation at the QCISD(T,FC)/6-31G(d)//B3LYP/6-31G(d) level;
- Single point calculation at the MP2(FC)/G3MP2large//B3LYP/6-31G(d) level.

The computed enthalpy and Gibbs free energy were used as obtained from the output in the gas phase, without introducing any correction, since the main objective of this work was the evaluation of the energy change associated with the reaction considered and was not intended to be directly compared with any experimental data.

Thermochemical data have been calculated adopting the default options, *viz.* temperature: 298.150 K and pressure: 1.00000 atm. Optimized geometry listed in cartesian format (coordinates are given in Å) are reported below. The conversion factor between Hartree and kcal·mol<sup>-1</sup> has been: 1 Hartree = 627.509 kcal·mol<sup>-1</sup>.

When summing the data for calculating the energy changes for the reactions considered, all the digits available from the calculations were used; nevertheless, the energy values reported below (in Hartree units) have been rounded considering 6 significant digits after the unit.

**Table S1.** Computed enthalpy and Gibbs free energy for the compounds describe in the text. These values have been used for calculating the reaction energy changes reported in Table 1 in the main text.

| Compound                                                                            | G3(MP2)B3 Enthalpy<br>(H, Hartree) | G3(MP2)B3 Gibbs Free Energy<br>(G, Hartree) |
|-------------------------------------------------------------------------------------|------------------------------------|---------------------------------------------|
| 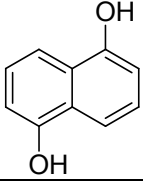   | -535.526679                        | -535.571348                                 |
| O <sub>2</sub>                                                                      | -150.168161                        | -150.191448                                 |
|    | -609.481647                        | -609.527361                                 |
| H <sub>2</sub> O                                                                    | -76.341863                         | -76.363309                                  |
|   | -389.945639                        | -389.994134                                 |
|  | -540.153894                        | -540.203936                                 |
|  | -345.027564                        | -345.065666                                 |
|  | -194.034539                        | -194.068509                                 |
|  | -691.264563                        | -691.322094                                 |
|  | -192.847397                        | -192.882602                                 |
|  | -235.407845                        | -235.443633                                 |
|  | -306.027908                        | -306.066111                                 |

Table S1. *Cont.*

| Compound                                                                            | G3(MP2)B3 Enthalpy<br>(H, Hartree) | G3(MP2)B3 Gibbs Free Energy<br>(G, Hartree) |
|-------------------------------------------------------------------------------------|------------------------------------|---------------------------------------------|
| 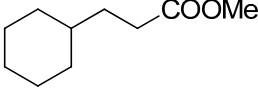   | -541.470896                        | -541.527630                                 |
|    | -349.775265                        | -349.823824                                 |
|    | -170.567318                        | -170.598428                                 |
|    | -520.388628                        | -520.449341                                 |
|    | -272.228308                        | -272.263296                                 |
|    | -169.669801                        | -169.700128                                 |
|   | -441.947714                        | -441.992647                                 |
|  | -406.148222                        | -406.186192                                 |
|  | -232.046577                        | -232.082877                                 |
| MeOH                                                                                | -115.553223                        | -115.580233                                 |
|  | -653.441734                        | -653.501638                                 |
| HF                                                                                  | -100.358704                        | -100.378439                                 |
|  | -534.320517                        | -534.364647                                 |

Table S1. *Cont.*

| Compound                                                                            | G3(MP2)B3 Enthalpy<br>(H, Hartree) | G3(MP2)B3 Gibbs Free Energy<br>(G, Hartree) |
|-------------------------------------------------------------------------------------|------------------------------------|---------------------------------------------|
| 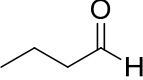   | -232.070218                        | -232.107748                                 |
|    | -766.442918                        | -766.501964                                 |
|    | -306.986463                        | -307.022195                                 |
|    | -461.533034                        | -461.581384                                 |
|   | -230.869239                        | -230.905235                                 |
|  | -692.435518                        | -692.497627                                 |
|  | -463.904434                        | -463.955026                                 |
|  | -463.903996                        | -463.949070                                 |
|  | -271.003234                        | -271.036807                                 |
|  | -270.964538                        | -270.997559                                 |
|  | -654.336069                        | -654.387413                                 |

Table S1. *Cont.*

| Compound                                                                            | G3(MP2)B3 Enthalpy<br>(H, Hartree) | G3(MP2)B3 Gibbs Free Energy<br>(G, Hartree) |
|-------------------------------------------------------------------------------------|------------------------------------|---------------------------------------------|
| 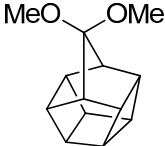   | -654.306700                        | -654.355761                                 |
|    | -387.788845                        | -387.838623                                 |
|    | -387.809395                        | -387.852526                                 |
|    | -358.957308                        | -358.993243                                 |
|  | -234.149617                        | -234.190018                                 |
|  | -593.157018                        | -593.211825                                 |
|  | -229.674812                        | -229.705894                                 |
|  | -574.690384                        | -574.738495                                 |
|  | -465.080242                        | -465.136027                                 |
|  | -465.067245                        | -465.122146                                 |

Table S1. *Cont.*

| Compound                                                                            | G3(MP2)B3 Enthalpy<br>(H, Hartree) | G3(MP2)B3 Gibbs Free Energy<br>(G, Hartree) |
|-------------------------------------------------------------------------------------|------------------------------------|---------------------------------------------|
| 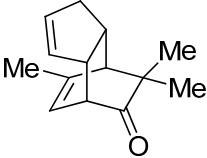   | -618.477659                        | -618.531424                                 |
|    | -618.462402                        | -618.516130                                 |
|    | -428.023483                        | -428.074203                                 |
|   | -2932.369583                       | -2932.412303                                |
|  | -3000.259962                       | -3000.315197                                |
|  | -360.172485                        | -360.209955                                 |
|  | -861.188818                        | -861.262892                                 |
| H <sub>2</sub>                                                                      | -1.167339                          | -1.182131                                   |
|  | -860.019243                        | -860.089963                                 |
| CH <sub>4</sub>                                                                     | -40.420548                         | -40.441690                                  |
| CO <sub>2</sub>                                                                     | -188.382178                        | -188.406529                                 |

## Cartesian coordinates

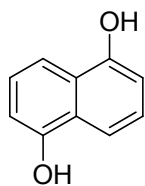

|   |             |             |             |
|---|-------------|-------------|-------------|
| C | 2.36324500  | -0.91081600 | -0.00000100 |
| C | 1.83538300  | 0.36406600  | -0.00000900 |
| C | 0.42364300  | 0.57677100  | 0.00000900  |
| C | -0.42364300 | -0.57677100 | 0.00001100  |
| C | 0.13948800  | -1.87984900 | 0.00001600  |
| C | 1.50704200  | -2.03478200 | 0.00002700  |
| H | 0.51992300  | 2.73967800  | 0.00002500  |
| H | 3.44330000  | -1.04905500 | 0.00000800  |
| C | -0.13948800 | 1.87984900  | 0.00001300  |
| C | -1.83538300 | -0.36406600 | -0.00000300 |
| H | -0.51992300 | -2.73967800 | 0.00005700  |
| H | 1.94282500  | -3.03004800 | 0.00004300  |
| C | -2.36324500 | 0.91081600  | 0.00001300  |
| C | -1.50704200 | 2.03478200  | 0.00002400  |
| H | -3.44330000 | 1.04905500  | 0.00001000  |
| H | -1.94282500 | 3.03004800  | 0.00002300  |
| O | -2.61601400 | -1.48891300 | -0.00004700 |
| H | -3.54761200 | -1.21953300 | -0.00005800 |
| O | 2.61601500  | 1.48891300  | -0.00003000 |
| H | 3.54761200  | 1.21953200  | -0.00009100 |

O<sub>2</sub>

|   |            |            |             |
|---|------------|------------|-------------|
| O | 0.00000000 | 0.00000000 | 0.60729600  |
| O | 0.00000000 | 0.00000000 | -0.60729600 |

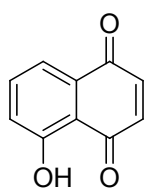

|   |             |             |             |
|---|-------------|-------------|-------------|
| C | -2.27690500 | -1.25344100 | -0.00002400 |
| C | -1.78166900 | 0.06546500  | -0.00002100 |
| C | -0.38217000 | 0.28338100  | -0.00000200 |
| C | 0.49295700  | -0.83218000 | -0.00000300 |
| C | -0.01129100 | -2.12616200 | -0.00000900 |
| C | -1.40025500 | -2.32711300 | -0.00002300 |
| H | -3.35283800 | -1.39508900 | -0.00001300 |
| C | 0.14843500  | 1.64856500  | 0.00002800  |
| C | 1.97059900  | -0.62198000 | 0.00000900  |
| H | 0.68285800  | -2.95934100 | -0.00000300 |
| H | -1.79610400 | -3.33893600 | -0.00002700 |
| C | 2.45855100  | 0.78102900  | 0.00000500  |
| C | 1.61685400  | 1.82805300  | -0.00001700 |
| H | 3.53823000  | 0.90156000  | 0.00001200  |
| H | 1.96203200  | 2.85820100  | -0.00006400 |

|   |             |             |             |
|---|-------------|-------------|-------------|
| O | -2.66544600 | 1.07095600  | 0.00006000  |
| H | -2.14272200 | 1.91522700  | 0.00018400  |
| O | -0.58955100 | 2.65048900  | -0.00005500 |
| O | 2.76723500  | -1.55336000 | 0.00002800  |

H<sub>2</sub>O

|   |            |             |             |
|---|------------|-------------|-------------|
| O | 0.00000000 | 0.00000000  | 0.11972000  |
| H | 0.00000000 | 0.76156000  | -0.47887900 |
| H | 0.00000000 | -0.76156000 | -0.47887900 |

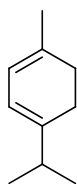

|   |             |             |             |
|---|-------------|-------------|-------------|
| C | 0.03942900  | -1.03776700 | -0.40872000 |
| C | -1.36926000 | -1.21233700 | 0.17937400  |
| C | -1.60854400 | 1.22902700  | 0.02018200  |
| C | -0.15508600 | 1.34730400  | 0.14324500  |
| H | -0.02050100 | -1.08775400 | -1.50899900 |
| H | -1.85726600 | -2.08079500 | -0.28111200 |
| H | -2.19521000 | 2.14436100  | -0.03904500 |
| H | 0.25993100  | 2.33062300  | 0.36003600  |
| H | -1.29545300 | -1.44326800 | 1.25642900  |
| H | 0.67129100  | -1.88033200 | -0.10427400 |
| C | -3.71385100 | -0.13856800 | -0.04939600 |
| H | -4.23087500 | 0.82563600  | -0.09492400 |
| H | -4.08934900 | -0.68396300 | 0.82931400  |
| H | -4.01385500 | -0.72773800 | -0.92780600 |
| C | 2.17386400  | 0.41249400  | 0.07929700  |
| H | 2.40175700  | 1.47527100  | 0.24135300  |
| C | 2.87865600  | -0.02178000 | -1.22120500 |
| C | 2.73447000  | -0.36530100 | 1.28796200  |
| H | 2.55787200  | -1.44336300 | 1.19068400  |
| H | 3.81770200  | -0.21618200 | 1.37375600  |
| H | 2.26855000  | -0.03106500 | 2.22126100  |
| H | 2.70705400  | -1.08359100 | -1.43516200 |
| H | 2.51849100  | 0.55705000  | -2.07901400 |
| H | 3.96208800  | 0.12666200  | -1.14081400 |
| C | 0.66662100  | 0.29246200  | -0.02392100 |
| C | -2.22333600 | 0.03087400  | 0.01623400  |

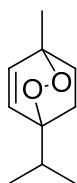

|   |             |             |             |
|---|-------------|-------------|-------------|
| C | 0.03248300  | 1.38574200  | -0.72668300 |
| C | -1.50483700 | 1.32348600  | -0.52262400 |
| C | -1.35293200 | -1.12628300 | -0.88046300 |
| C | -0.03262600 | -1.07199800 | -1.06571200 |
| H | 0.45855900  | 2.18533400  | -0.11610600 |



|   |             |             |             |
|---|-------------|-------------|-------------|
| H | -1.83303500 | 2.09100400  | 0.18650200  |
| H | -2.01410300 | -1.86763600 | -1.32210600 |
| H | 0.53073400  | -1.76115500 | -1.68854000 |
| H | -2.04516300 | 1.48450300  | -1.46213400 |
| H | 0.29475200  | 1.58681300  | -1.77164700 |
| C | -3.33365500 | -0.20236900 | 0.44167300  |
| H | -3.51992000 | -1.18374400 | 0.88893900  |
| H | -3.96288300 | -0.09777300 | -0.44905300 |
| H | -3.61949400 | 0.56893300  | 1.16303600  |
| C | 2.19092900  | -0.03088700 | -0.33484000 |
| H | 2.44063200  | 0.00707400  | -1.40632900 |
| C | 2.72484700  | -1.35776600 | 0.23525600  |
| C | 2.88030900  | 1.15627800  | 0.35830700  |
| H | 2.56809000  | 1.23198600  | 1.40491100  |
| H | 3.96722400  | 1.01870600  | 0.33857800  |
| H | 2.66325400  | 2.10996300  | -0.13282700 |
| H | 2.52229200  | -1.42743500 | 1.30793100  |
| H | 2.26843700  | -2.23002300 | -0.24384600 |
| H | 3.80834300  | -1.42232700 | 0.08433000  |
| C | 0.64500700  | 0.03484400  | -0.28509000 |
| C | -1.86800500 | -0.05990900 | 0.05661700  |
| O | 0.30524500  | -0.13712400 | 1.12190500  |
| O | -1.15734900 | -0.18800700 | 1.32306000  |

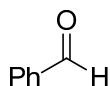

|   |             |             |             |
|---|-------------|-------------|-------------|
| C | 1.73576200  | 1.06060400  | -0.00003100 |
| C | 0.36107600  | 1.29223900  | 0.00000600  |
| C | -0.53398200 | 0.21467700  | 0.00003300  |
| C | -0.04523300 | -1.10089500 | 0.00004600  |
| C | 1.32640000  | -1.33125700 | 0.00001900  |
| C | 2.21687300  | -0.25091500 | -0.00003300 |
| H | 2.42989800  | 1.89631900  | -0.00006700 |
| H | -0.02484800 | 2.30980200  | -0.00001300 |
| H | -0.75849900 | -1.91958700 | 0.00007300  |
| H | 1.70768800  | -2.34873800 | 0.00002600  |
| H | 3.28827100  | -0.43341400 | -0.00004800 |
| C | -1.99240000 | 0.46891800  | 0.00005800  |
| H | -2.27462700 | 1.54573900  | 0.00023700  |
| O | -2.84735700 | -0.39629400 | -0.00010000 |

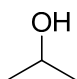

|   |             |             |             |
|---|-------------|-------------|-------------|
| O | -0.03688200 | 1.37008600  | -0.16628300 |
| H | -0.87508800 | 1.77206400  | 0.11041700  |
| C | 0.00174900  | 0.04198600  | 0.36500800  |
| H | -0.00621700 | 0.08441400  | 1.46807000  |
| C | -1.20484100 | -0.77448700 | -0.10340700 |
| C | 1.32649600  | -0.55987700 | -0.08862400 |
| H | -2.14518000 | -0.31293000 | 0.22583800  |
| H | -1.22008100 | -0.83443600 | -1.19754100 |
| H | -1.17725900 | -1.79285100 | 0.30190900  |
| H | 1.35941100  | -0.62106200 | -1.18232000 |

|   |            |             |            |
|---|------------|-------------|------------|
| H | 2.16105600 | 0.06528700  | 0.24389700 |
| H | 1.45798900 | -1.56690700 | 0.32212600 |

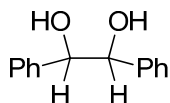

|   |             |             |             |
|---|-------------|-------------|-------------|
| C | -0.42423000 | -0.03774500 | 0.70336200  |
| C | 0.42392800  | 0.00885600  | -0.60586300 |
| H | -0.11438300 | 0.78974100  | 1.35282700  |
| H | 0.10652900  | 0.87943900  | -1.19765800 |
| C | -1.91125100 | 0.11188000  | 0.38113000  |
| C | -2.79057200 | -0.96944200 | 0.50347300  |
| C | -2.41365900 | 1.34002900  | -0.07474300 |
| C | -4.14037900 | -0.83036100 | 0.16856200  |
| H | -2.41375700 | -1.90883000 | 0.89489200  |
| C | -3.76016000 | 1.48191600  | -0.40629400 |
| H | -1.74793100 | 2.19707600  | -0.16100200 |
| C | -4.62861700 | 0.39312000  | -0.28933400 |
| H | -4.81106500 | -1.67924700 | 0.27425200  |
| H | -4.13339400 | 2.44253400  | -0.75169900 |
| H | -5.67878200 | 0.50240800  | -0.54634000 |
| C | 1.91119100  | 0.11583600  | -0.33464800 |
| C | 2.77530800  | -0.96918700 | -0.51009700 |
| C | 2.43595200  | 1.33336900  | 0.11773400  |
| C | 4.13733500  | -0.83918200 | -0.23005100 |
| H | 2.38174700  | -1.90883200 | -0.88138200 |
| C | 3.79467200  | 1.46350800  | 0.40003500  |
| H | 1.77737000  | 2.19045100  | 0.24661500  |
| C | 4.65128900  | 0.37383000  | 0.22801600  |
| H | 4.79773600  | -1.69062200 | -0.37296400 |
| H | 4.18492200  | 2.41602100  | 0.74881300  |
| H | 5.71155000  | 0.47271600  | 0.44489300  |
| O | 0.17083100  | -1.19665900 | -1.33269200 |
| H | -0.77489700 | -1.19579300 | -1.55894200 |
| O | -0.13365400 | -1.23703100 | 1.39504100  |
| H | 0.05209500  | -1.89610200 | 0.70121800  |

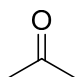

|   |             |             |             |
|---|-------------|-------------|-------------|
| C | 0.00000000  | 0.18530800  | 0.00000000  |
| C | -1.29310100 | -0.61479100 | 0.00000400  |
| C | 1.29309900  | -0.61479400 | -0.00000400 |
| H | -2.14853100 | 0.06356300  | 0.00021200  |
| H | -1.34153000 | -1.26714800 | -0.88109400 |
| H | -1.34134300 | -1.26749300 | 0.88085500  |
| H | 2.14853000  | 0.06355700  | -0.00021500 |
| H | 1.34152700  | -1.26714800 | 0.88109600  |
| H | 1.34133800  | -1.26750000 | -0.88085300 |
| O | 0.00000300  | 1.40097900  | 0.00000000  |

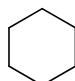

|   |             |             |             |
|---|-------------|-------------|-------------|
| C | 1.45211700  | -0.21100900 | 0.22934500  |
| C | 0.54319900  | -1.36271900 | -0.22937300 |
| C | -0.90873000 | -1.15170600 | 0.22942400  |
| C | -1.45211300 | 0.21100300  | -0.22935400 |
| C | -0.54320600 | 1.36271700  | 0.22936900  |
| C | 0.90873200  | 1.15171200  | -0.22941100 |
| H | -1.54777400 | -1.96154300 | -0.14589500 |
| H | 0.56845100  | -1.42609700 | -1.32770700 |
| H | 0.92467400  | -2.32106600 | 0.14627100  |
| H | 1.51970200  | -0.22063000 | 1.32764700  |
| H | 2.47292400  | -0.35933000 | -0.14630900 |
| H | -1.51968000 | 0.22061200  | -1.32765700 |
| H | -2.47292800 | 0.35932800  | 0.14627600  |
| H | -0.92467700 | 2.32106300  | -0.14628700 |
| H | -0.56847200 | 1.42610200  | 1.32770200  |
| H | 0.95049700  | 1.20468600  | -1.32775100 |
| H | 1.54776800  | 1.96153900  | 0.14594300  |
| H | -0.95047800 | -1.20465500 | 1.32776700  |

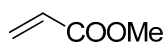

|   |             |             |             |
|---|-------------|-------------|-------------|
| C | -0.04359800 | 0.11760100  | -0.00005700 |
| O | 0.06062500  | 1.32782300  | -0.00004800 |
| C | -2.49176300 | -0.01310400 | 0.00007700  |
| H | -2.53026100 | 1.07257100  | 0.00023700  |
| H | -3.43292400 | -0.55451400 | 0.00009100  |
| C | -1.31702900 | -0.64641300 | -0.00009500 |
| H | -1.23949400 | -1.72960900 | -0.00019300 |
| O | 1.01687200  | -0.72524800 | 0.00008400  |
| C | 2.30319300  | -0.08855000 | -0.00000900 |
| H | 2.42417200  | 0.53384100  | 0.89092300  |
| H | 3.03226900  | -0.89941500 | -0.00345500 |
| H | 2.42144700  | 0.53932300  | -0.88738400 |

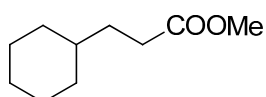

|   |             |             |             |
|---|-------------|-------------|-------------|
| C | -3.53151500 | -1.12155500 | 0.13474200  |
| C | -2.03846200 | -1.29781200 | 0.45140600  |
| C | -1.15418000 | -0.28219200 | -0.29951800 |
| C | -1.63894000 | 1.15283500  | -0.01425200 |
| C | -3.13220800 | 1.33555100  | -0.33150700 |
| C | -4.00089500 | 0.31320300  | 0.41519000  |
| H | -1.88025700 | -1.17446700 | 1.53406100  |
| H | -1.71885000 | -2.31962300 | 0.20639700  |
| H | -3.70591700 | -1.35880400 | -0.92528500 |
| H | -4.12603500 | -1.83858600 | 0.71529600  |
| H | -1.46255700 | 1.38077000  | 1.04876300  |
| H | -1.05120200 | 1.87973100  | -0.58884900 |
| H | -3.44557200 | 2.35733900  | -0.08164400 |
| H | -3.28743300 | 1.21918300  | -1.41440800 |
| H | -3.94108800 | 0.50863800  | 1.49628900  |
| H | -5.05529500 | 0.43180800  | 0.13452900  |
| H | -1.27741500 | -0.46976700 | -1.37929400 |
| C | 0.32991800  | -0.49786800 | 0.04863500  |

|   |            |             |             |
|---|------------|-------------|-------------|
| H | 0.49628700 | -0.26905400 | 1.10949200  |
| H | 0.57156100 | -1.56127200 | -0.08449200 |
| C | 1.30961900 | 0.33440400  | -0.80599500 |
| H | 1.15986900 | 1.40331100  | -0.62194600 |
| H | 1.14742700 | 0.13722300  | -1.86989600 |
| C | 2.75055400 | -0.01397500 | -0.49943200 |
| C | 4.47970500 | 0.20104600  | 1.09035200  |
| H | 4.61195900 | -0.87994300 | 1.18835600  |
| H | 5.19815900 | 0.57889400  | 0.35780200  |
| H | 4.62020400 | 0.69324700  | 2.05338600  |
| O | 3.13683000 | 0.51304400  | 0.68867900  |
| O | 3.47624100 | -0.69559900 | -1.19071500 |

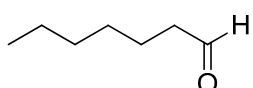

|   |             |             |             |
|---|-------------|-------------|-------------|
| C | 3.35450300  | -0.24206500 | 0.29064900  |
| H | 3.37140800  | -0.87079000 | 1.21242100  |
| C | 0.83222100  | -0.29794800 | 0.10824200  |
| H | 0.87885300  | -0.98942000 | -0.74406800 |
| H | 0.81590000  | -0.92383700 | 1.01228400  |
| C | -0.46281500 | 0.52135800  | 0.03317100  |
| H | -0.50451500 | 1.21079900  | 0.88932500  |
| H | -0.44017900 | 1.15350700  | -0.86618500 |
| C | 2.09848600  | 0.58041600  | 0.11660000  |
| H | 2.18919100  | 1.16376000  | -0.80576000 |
| H | 2.03957200  | 1.28455900  | 0.96148400  |
| O | 4.28668400  | -0.26109000 | -0.48221000 |
| C | -1.72824500 | -0.34544000 | 0.01431200  |
| H | -1.68409200 | -1.03502000 | -0.84167100 |
| H | -1.74918200 | -0.97891700 | 0.91363200  |
| C | -3.02591300 | 0.46984600  | -0.06041700 |
| H | -3.00439300 | 1.10197800  | -0.95947100 |
| H | -3.06994500 | 1.15935600  | 0.79463700  |
| C | -4.28539400 | -0.40224500 | -0.07889100 |
| H | -5.19374200 | 0.20824300  | -0.13503900 |
| H | -4.28554900 | -1.07988900 | -0.94150700 |
| H | -4.35386500 | -1.01912400 | 0.82560800  |

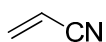

|   |             |             |            |
|---|-------------|-------------|------------|
| C | -0.57939300 | -0.53410000 | 0.00000000 |
| C | 1.32187000  | 0.98507600  | 0.00000000 |
| H | 2.03285400  | 0.16489100  | 0.00000000 |
| H | 1.72166300  | 1.99405700  | 0.00000000 |
| C | 0.00000000  | 0.77452900  | 0.00000000 |
| H | -0.70294500 | 1.60423200  | 0.00000000 |
| N | -1.07234800 | -1.58803000 | 0.00000000 |

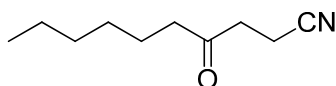

|   |             |            |            |
|---|-------------|------------|------------|
| C | 1.48005000  | 0.33108800 | 0.00021400 |
| C | -1.08064000 | 0.30797800 | 0.00020700 |

|   |             |             |             |
|---|-------------|-------------|-------------|
| H | -1.08519300 | 0.97048300  | 0.87465100  |
| H | -1.08531300 | 0.97034500  | -0.87434400 |
| C | -2.33959700 | -0.56798500 | 0.00031400  |
| H | -2.32599000 | -1.23062300 | -0.87811100 |
| H | -2.32607800 | -1.23029300 | 0.87898700  |
| C | 0.21213300  | -0.51077100 | 0.00008900  |
| H | 0.25109900  | -1.18161000 | 0.87226900  |
| H | 0.25113900  | -1.18113600 | -0.87247000 |
| O | 1.45846800  | 1.54777600  | 0.00004200  |
| C | -3.64078600 | 0.24463700  | 0.00011700  |
| H | -3.65538900 | 0.90661800  | 0.87856600  |
| H | -3.65497200 | 0.90687500  | -0.87814500 |
| C | -4.90520200 | -0.62412200 | -0.00030800 |
| H | -4.89024300 | -1.28560000 | 0.87767100  |
| H | -4.88993400 | -1.28518400 | -0.87859500 |
| C | -6.19979800 | 0.19519700  | -0.00031700 |
| H | -7.08360100 | -0.45282300 | -0.00077500 |
| H | -6.26026100 | 0.84066800  | 0.88456600  |
| H | -6.25983900 | 0.84134100  | -0.88473800 |
| C | 2.80381900  | -0.43262300 | 0.00052200  |
| H | 2.83350400  | -1.09566200 | 0.87523600  |
| H | 2.83332100  | -1.09684600 | -0.87329000 |
| C | 4.01294500  | 0.51738000  | -0.00021500 |
| H | 3.97322100  | 1.17468100  | -0.87545400 |
| H | 3.97374100  | 1.17538300  | 0.87451700  |
| C | 5.28361400  | -0.21125800 | -0.00030900 |
| N | 6.28197400  | -0.80370800 | -0.00039600 |

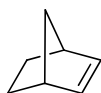

|   |             |             |             |
|---|-------------|-------------|-------------|
| C | -1.27886600 | -0.67062700 | -0.50778600 |
| C | -0.08736200 | -1.12867400 | 0.32265300  |
| C | -0.08831700 | 1.12841700  | 0.32315600  |
| C | -1.27956200 | 0.66990400  | -0.50726200 |
| H | -1.92034800 | -1.32910300 | -1.08579700 |
| H | -1.92158800 | 1.32827000  | -1.08481800 |
| C | -0.04101100 | -0.00042200 | 1.38045600  |
| H | 0.87852400  | -0.00012200 | 1.97942500  |
| H | -0.91211500 | -0.00090400 | 2.04317100  |
| C | 1.19173400  | -0.78019600 | -0.51634400 |
| H | 2.08933600  | -1.17666500 | -0.02775100 |
| H | 1.14750200  | -1.20639200 | -1.52301100 |
| C | 1.19079200  | 0.78143200  | -0.51636200 |
| H | 2.08804000  | 1.17899300  | -0.02806500 |
| H | 1.14574800  | 1.20746000  | -1.52305400 |
| H | -0.11882100 | -2.15796400 | 0.68882600  |
| H | -0.12072700 | 2.15742800  | 0.69000900  |

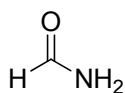

|   |            |            |            |
|---|------------|------------|------------|
| C | 0.16205200 | 0.38759300 | 0.00000000 |
|---|------------|------------|------------|

|   |             |             |             |
|---|-------------|-------------|-------------|
| H | 0.12931500  | 1.49581800  | 0.00000200  |
| O | 1.20016600  | -0.24551600 | 0.00002000  |
| N | -1.08601800 | -0.15816100 | -0.00011600 |
| H | -1.91675900 | 0.41431400  | 0.00042200  |
| H | -1.18406600 | -1.16443500 | 0.00022900  |

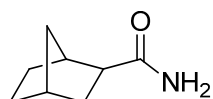

|   |             |             |             |
|---|-------------|-------------|-------------|
| C | 1.69229800  | 1.39277100  | 0.05800200  |
| C | 0.40217100  | 0.77905500  | 0.65197000  |
| C | 1.54872300  | -1.03471600 | -0.06614400 |
| C | 2.48486000  | 0.13919300  | -0.44038900 |
| H | 1.48062100  | 2.10983100  | -0.74369500 |
| H | 2.24929200  | 1.93032000  | 0.83395000  |
| H | 2.69521200  | 0.17208900  | -1.51543900 |
| H | 3.44783900  | 0.05241800  | 0.07566400  |
| C | 0.93089300  | -0.53816800 | 1.25837200  |
| H | 0.13453300  | -1.18718400 | 1.63354800  |
| H | 1.67130500  | -0.37327300 | 2.05041600  |
| C | -0.47045800 | 0.25722400  | -0.53768700 |
| H | -0.52110300 | 1.01828800  | -1.32627000 |
| C | 0.31696800  | -1.00940100 | -0.99979800 |
| H | -0.30408700 | -1.89598600 | -0.84341800 |
| H | 0.59232300  | -0.96075100 | -2.05904000 |
| H | -0.13599300 | 1.44796300  | 1.33103000  |
| H | 2.04888300  | -2.00699300 | -0.03100400 |
| C | -1.88935200 | -0.06981300 | -0.07270800 |
| O | -2.21125000 | -1.14595200 | 0.41573800  |
| N | -2.79147800 | 0.95109700  | -0.21616700 |
| H | -3.70906800 | 0.83340700  | 0.19042900  |
| H | -2.51602800 | 1.87293900  | -0.51861000 |

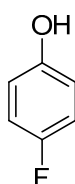

|   |             |             |             |
|---|-------------|-------------|-------------|
| C | -0.70251100 | -1.21407100 | 0.00000000  |
| C | 0.69344300  | -1.19902200 | -0.00000100 |
| C | 1.38373000  | 0.01777700  | 0.00000000  |
| C | 0.67310100  | 1.22333500  | 0.00000200  |
| C | -0.71994800 | 1.21183500  | -0.00000300 |
| C | -1.38945100 | -0.00737600 | 0.00000000  |
| H | -1.25540900 | -2.14765000 | 0.00000200  |
| H | 1.24294500  | -2.13834300 | -0.00000300 |
| H | 1.22335200  | 2.15856200  | 0.00000600  |
| H | -1.28957800 | 2.13541900  | 0.00000400  |
| O | 2.75120300  | 0.09506200  | -0.00000400 |
| H | 3.11818300  | -0.80246500 | 0.00002700  |
| F | -2.74214500 | -0.01787500 | 0.00000000  |

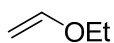

|   |             |             |             |
|---|-------------|-------------|-------------|
| C | 2.06119000  | 0.57956500  | -0.00002400 |
| H | 1.61327900  | 1.56629800  | 0.00013700  |
| H | 3.14373100  | 0.52519800  | -0.00007100 |
| C | 1.35634300  | -0.55668000 | -0.00003800 |
| H | 1.83858700  | -1.53092700 | -0.00004900 |
| O | 0.00872900  | -0.71699300 | 0.00006600  |
| C | -0.78920200 | 0.46705500  | 0.00003800  |
| H | -0.54809100 | 1.06935500  | 0.88770600  |
| H | -0.54816500 | 1.06936400  | -0.88766000 |
| C | -2.24807900 | 0.04562100  | -0.00002500 |
| H | -2.47707600 | -0.55310100 | -0.88731400 |
| H | -2.47758900 | -0.55248600 | 0.88753600  |
| H | -2.89601800 | 0.92888000  | -0.00051800 |

## MeOH

|   |             |             |             |
|---|-------------|-------------|-------------|
| C | 0.66232500  | -0.01954500 | 0.00000000  |
| H | 1.07971800  | 0.99103200  | -0.00000100 |
| H | 1.03695800  | -0.54365800 | -0.89314700 |
| H | 1.03695800  | -0.54365600 | 0.89314900  |
| O | -0.74916800 | 0.12249700  | 0.00000000  |
| H | -1.13423600 | -0.76642000 | 0.00000000  |

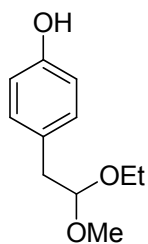

|   |             |             |             |
|---|-------------|-------------|-------------|
| C | -1.22737200 | 0.43772100  | 0.89333000  |
| C | -2.51386600 | 0.94898000  | 0.72961100  |
| C | -3.45142800 | 0.25161200  | -0.03929800 |
| C | -3.09099700 | -0.95728800 | -0.64046300 |
| C | -1.80197500 | -1.45518000 | -0.46525800 |
| C | -0.84657200 | -0.77359200 | 0.30170700  |
| H | -0.50336700 | 0.99197700  | 1.48270100  |
| H | -2.79037500 | 1.89076300  | 1.20165500  |
| H | -3.82731200 | -1.49209800 | -1.23226800 |
| H | -1.53473300 | -2.40059700 | -0.93281000 |
| O | -4.73075400 | 0.70047700  | -0.23428600 |
| H | -4.84254400 | 1.53972400  | 0.23848000  |
| C | 0.55357800  | -1.32478500 | 0.46732200  |
| H | 0.87568800  | -1.23671100 | 1.51155700  |
| C | 1.59585800  | -0.62426800 | -0.41983400 |
| H | 1.22373300  | -0.55347600 | -1.45158700 |
| C | 3.51128400  | -1.60586200 | 0.65171100  |
| C | 2.49339500  | 1.55657500  | -0.76677300 |
| H | 0.56913500  | -2.38925900 | 0.20762200  |
| H | 3.47191200  | 1.13654600  | -1.03355600 |
| H | 1.91658500  | 1.67240600  | -1.69804900 |
| H | 3.02086100  | -2.37848800 | 1.25998400  |
| H | 4.49933800  | -1.96912400 | 0.35767800  |
| O | 2.80461300  | -1.34957000 | -0.55595800 |
| O | 1.80344700  | 0.66397500  | 0.11008400  |

|   |            |             |             |
|---|------------|-------------|-------------|
| H | 3.62409400 | -0.69637100 | 1.25361400  |
| C | 2.64753300 | 2.89195000  | -0.05906100 |
| H | 3.22552700 | 2.77569400  | 0.86377100  |
| H | 3.16828100 | 3.60732800  | -0.70518900 |
| H | 1.66810000 | 3.30745900  | 0.19970300  |

HF

|   |            |            |             |
|---|------------|------------|-------------|
| F | 0.00000000 | 0.00000000 | 0.09338400  |
| H | 0.00000000 | 0.00000000 | -0.84045800 |

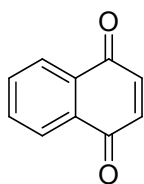

|   |             |             |             |
|---|-------------|-------------|-------------|
| C | -2.67766300 | 0.69945100  | 0.00006100  |
| C | -1.47290700 | 1.40008600  | 0.00004100  |
| C | -0.26007600 | 0.70439100  | 0.00000100  |
| C | -0.25986500 | -0.70451300 | -0.00012000 |
| C | -1.47262400 | -1.40030300 | -0.00007500 |
| C | -2.67746900 | -0.69985700 | 0.00001400  |
| H | -3.61899300 | 1.24189400  | 0.00013000  |
| C | 1.02453700  | 1.46301700  | 0.00016800  |
| C | 1.02482300  | -1.46279800 | -0.00039900 |
| H | -1.44733800 | -2.48527700 | -0.00016800 |
| H | -3.61866600 | -1.24256100 | 0.00002000  |
| C | 2.28154100  | -0.67159300 | -0.00001900 |
| C | 2.28139200  | 0.67192200  | 0.00005700  |
| H | 3.19920000  | -1.25358600 | 0.00006800  |
| H | 3.19889200  | 1.25419300  | 0.00015200  |
| O | 1.06125400  | 2.68809500  | -0.00010300 |
| O | 1.06180500  | -2.68790900 | 0.00026600  |
| H | -1.44771100 | 2.48503700  | 0.00011900  |

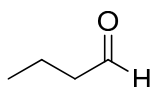

|   |             |             |             |
|---|-------------|-------------|-------------|
| C | -1.46458800 | 0.22310600  | 0.28531900  |
| H | -1.51892700 | 1.10766300  | 0.96340800  |
| C | 1.01488100  | 0.50453000  | -0.14014000 |
| H | 0.82737200  | 0.88186800  | -1.15375900 |
| H | 0.99472200  | 1.37990200  | 0.52384200  |
| C | 2.39725500  | -0.15223200 | -0.08134600 |
| H | 2.62438900  | -0.50749900 | 0.93108500  |
| H | 2.45577100  | -1.01353000 | -0.75709900 |
| H | 3.18183600  | 0.55496700  | -0.37219800 |
| C | -0.11784000 | -0.46245700 | 0.25585100  |
| H | -0.17590100 | -1.31490000 | -0.42937800 |
| H | 0.08227000  | -0.85098200 | 1.26697900  |
| O | -2.43122300 | -0.11439600 | -0.36137300 |



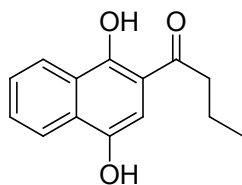

|   |             |             |             |
|---|-------------|-------------|-------------|
| C | 0.69831800  | -0.36554600 | -0.28295100 |
| C | -0.42278700 | -1.18999700 | -0.07775800 |
| C | -1.73244100 | -0.61521100 | 0.04423000  |
| C | -1.89465100 | 0.79872700  | -0.04073400 |
| C | -0.73591900 | 1.61779000  | -0.24872300 |
| C | 0.50406300  | 1.05311400  | -0.36456900 |
| H | -2.73195200 | -2.50545500 | 0.31119100  |
| C | -2.87049600 | -1.43194700 | 0.24897500  |
| C | -3.19106100 | 1.35135100  | 0.08160200  |
| H | 1.36520100  | 1.69675700  | -0.52041900 |
| C | -4.28409700 | 0.53127600  | 0.28136100  |
| C | -4.12466800 | -0.86861700 | 0.36577300  |
| H | -5.27536100 | 0.96691300  | 0.37428100  |
| H | -4.99245400 | -1.50309500 | 0.52291000  |
| O | -0.33261400 | -2.52122100 | 0.01311200  |
| H | 0.64027000  | -2.73678400 | -0.09126500 |
| C | 2.02186800  | -0.98281700 | -0.39868900 |
| O | 2.16624600  | -2.21944700 | -0.32003000 |
| C | 3.27186800  | -0.13648200 | -0.57146500 |
| H | 4.02167900  | -0.78112800 | -1.04101600 |
| H | 3.09103400  | 0.70919300  | -1.24528200 |
| C | 3.81165500  | 0.37479300  | 0.78236100  |
| H | 3.05062700  | 0.99515400  | 1.27284900  |
| H | 3.97790800  | -0.48849500 | 1.43841600  |
| C | 5.11124900  | 1.17028000  | 0.62853800  |
| H | 5.89783600  | 0.55902500  | 0.17058300  |
| H | 4.96581400  | 2.05342400  | -0.00586800 |
| H | 5.47907400  | 1.51507300  | 1.60131300  |
| O | -0.96368100 | 2.96960000  | -0.32081100 |
| H | -0.11850100 | 3.42058600  | -0.46936000 |
| H | -3.30817900 | 2.42708800  | 0.01580400  |

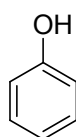

|   |             |             |             |
|---|-------------|-------------|-------------|
| C | 1.13169600  | 1.21940500  | -0.00000100 |
| C | -0.26387400 | 1.19983500  | 0.00000200  |
| C | -0.94080000 | -0.02456700 | 0.00000100  |
| C | -0.22123400 | -1.22431500 | 0.00000400  |
| C | 1.17160400  | -1.19037000 | -0.00000500 |
| C | 1.85730900  | 0.02761500  | 0.00000000  |
| H | 1.65023200  | 2.17463600  | 0.00000200  |
| H | -0.82671600 | 2.13191200  | -0.00000400 |
| H | -0.76605800 | -2.16310900 | 0.00000600  |
| H | 1.72555000  | -2.12557200 | 0.00000300  |
| H | 2.94309100  | 0.04676100  | 0.00000500  |
| O | -2.30694900 | -0.11178600 | -0.00000400 |
| H | -2.67871500 | 0.78403800  | 0.00001400  |

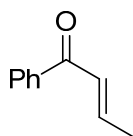

|   |             |             |             |
|---|-------------|-------------|-------------|
| C | 0.72659800  | 0.66271900  | -0.04478500 |
| O | 0.95581100  | 1.86497700  | -0.15332900 |
| C | 3.11641600  | 0.07745500  | -0.02488400 |
| H | 3.29554400  | 1.13786600  | -0.20010500 |
| C | 1.83880000  | -0.31909700 | 0.07150100  |
| H | 1.60986700  | -1.36485200 | 0.25499400  |
| C | 4.31224200  | -0.81277000 | 0.08952000  |
| H | 4.96461300  | -0.48308600 | 0.90959300  |
| H | 4.03490000  | -1.85668400 | 0.26767700  |
| H | 4.92020400  | -0.76678200 | -0.82426200 |
| C | -0.69396000 | 0.17354200  | -0.01502200 |
| C | -1.05497600 | -1.17992200 | -0.10319700 |
| C | -1.70881600 | 1.13929200  | 0.08954100  |
| C | -2.39806700 | -1.55704100 | -0.08291400 |
| H | -0.29735600 | -1.94945600 | -0.20691400 |
| C | -3.04749100 | 0.76305400  | 0.11796000  |
| H | -1.41547000 | 2.18221400  | 0.14705700  |
| C | -3.39592600 | -0.58841700 | 0.03215300  |
| H | -2.66425600 | -2.60788600 | -0.15829700 |
| H | -3.82192700 | 1.52041800  | 0.20518600  |
| H | -4.44151600 | -0.88445100 | 0.05246600  |

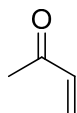

|   |             |             |             |
|---|-------------|-------------|-------------|
| C | -0.44115300 | 0.16357500  | -0.00002500 |
| O | -0.40155900 | 1.38331300  | -0.00000800 |
| C | 2.01511900  | -0.10445200 | 0.00000900  |
| H | 2.11033900  | 0.97815700  | 0.00008200  |
| H | 2.92678200  | -0.69474800 | 0.00005500  |
| C | 0.80325300  | -0.66736700 | -0.00002700 |
| H | 0.68629500  | -1.74976000 | -0.00003000 |
| C | -1.75629100 | -0.59463000 | 0.00000800  |
| H | -2.59111300 | 0.10839900  | -0.00025600 |
| H | -1.82259000 | -1.24593600 | -0.88122600 |
| H | -1.82281400 | -1.24537000 | 0.88164800  |

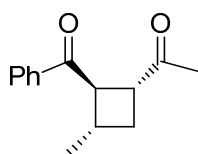

|   |            |             |             |
|---|------------|-------------|-------------|
| C | 1.05843200 | 1.66106200  | -0.84788700 |
| C | 0.81882900 | 0.30016500  | -0.08977000 |
| C | 2.27952300 | -0.10762800 | -0.46814300 |
| C | 2.58069200 | 1.38116800  | -0.75189500 |
| H | 0.73891000 | 0.48714100  | 0.98659200  |
| H | 2.24595000 | -0.71954300 | -1.37372400 |

|   |             |             |             |
|---|-------------|-------------|-------------|
| H | 3.19211100  | 1.60912000  | -1.63038300 |
| H | 3.02602300  | 1.84976300  | 0.13156800  |
| C | 3.05365900  | -0.80498400 | 0.63624100  |
| O | 3.59633100  | -0.17466700 | 1.52705400  |
| C | 3.07696600  | -2.32105700 | 0.59160000  |
| H | 2.08039900  | -2.72034700 | 0.36949400  |
| H | 3.73303600  | -2.64894400 | -0.22609600 |
| H | 3.45280700  | -2.72357300 | 1.53466000  |
| H | 0.72322900  | 1.54597700  | -1.88627400 |
| C | 0.50686400  | 2.95126200  | -0.25995300 |
| H | 0.82125800  | 3.07549200  | 0.78375700  |
| H | 0.87747500  | 3.81722600  | -0.82224700 |
| H | -0.58862500 | 2.97850100  | -0.29378800 |
| C | -0.29751400 | -0.59751200 | -0.59092400 |
| O | -0.05638600 | -1.48071500 | -1.40594000 |
| C | -1.70284800 | -0.36899600 | -0.12072000 |
| C | -2.03733000 | 0.55063300  | 0.88559000  |
| C | -2.72526800 | -1.12362200 | -0.72052700 |
| C | -3.36555500 | 0.71350600  | 1.28023900  |
| H | -1.26688900 | 1.13991000  | 1.37108600  |
| C | -4.04932400 | -0.95903200 | -0.32837400 |
| H | -2.45130000 | -1.83323800 | -1.49420400 |
| C | -4.37256500 | -0.03888500 | 0.67401600  |
| H | -3.61254400 | 1.42607300  | 2.06231300  |
| H | -4.83198500 | -1.54624100 | -0.80098100 |
| H | -5.40678200 | 0.08926200  | 0.98234900  |

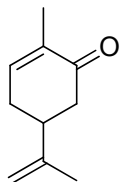

|   |             |             |             |
|---|-------------|-------------|-------------|
| C | -0.88848800 | -0.10135800 | 0.36212500  |
| C | -0.09061400 | 1.05725800  | -0.26859700 |
| C | 1.40967000  | 0.92533900  | -0.03160900 |
| C | 1.97794900  | -0.45090100 | -0.00193900 |
| C | 1.15784000  | -1.51566100 | -0.09681400 |
| C | -0.34262000 | -1.43892900 | -0.18175200 |
| H | -0.24532400 | 1.07105200  | -1.35842300 |
| H | -0.41183700 | 2.03129400  | 0.11322200  |
| H | -0.67783300 | -0.09163800 | 1.44016800  |
| H | 1.59492200  | -2.51463800 | -0.11237700 |
| H | -0.64919700 | -1.57920900 | -1.23078700 |
| H | -0.78881200 | -2.27612100 | 0.37026600  |
| O | 2.12518000  | 1.91011500  | 0.08809200  |
| C | 3.47443300  | -0.55774700 | 0.11897300  |
| H | 3.97196900  | -0.03099500 | -0.70338300 |
| H | 3.82386800  | -0.08149300 | 1.04204000  |
| H | 3.79972400  | -1.60259900 | 0.11731300  |
| C | -2.39256800 | 0.04095700  | 0.19364900  |
| C | -3.19437600 | 0.06956600  | 1.26386800  |
| H | -4.27324400 | 0.16627700  | 1.16869200  |
| H | -2.80264500 | 0.00035500  | 2.27597200  |
| C | -2.95224000 | 0.15143200  | -1.20599700 |
| H | -2.57549500 | 1.04356800  | -1.72288600 |

|   |             |             |             |
|---|-------------|-------------|-------------|
| H | -2.67719800 | -0.71018600 | -1.82842600 |
| H | -4.04425800 | 0.21368000  | -1.18756700 |

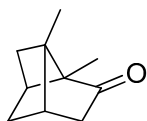

|   |             |             |             |
|---|-------------|-------------|-------------|
| C | -0.52191700 | -1.48818300 | -1.19285500 |
| C | -0.51680600 | -1.39632000 | 0.36735200  |
| C | 0.28261200  | 0.66192700  | -0.30022300 |
| C | -0.57283600 | 0.02118800  | -1.48596900 |
| H | 0.36853100  | -1.99261900 | -1.58505200 |
| H | -0.40901300 | 0.35299700  | -2.51439000 |
| C | -0.94029400 | 0.11101300  | 0.53916900  |
| C | 0.95239500  | -1.42219100 | 0.81113600  |
| H | 1.06360000  | -1.31685100 | 1.89951600  |
| H | 1.51060000  | -2.31368700 | 0.50770800  |
| C | 1.49391900  | -0.15510500 | 0.13756000  |
| H | -1.16233400 | -2.11663700 | 0.87767000  |
| H | -1.40253300 | -2.00157400 | -1.59359800 |
| C | -1.83912400 | 0.41516600  | -0.68212000 |
| C | 0.56482700  | 2.15052600  | -0.40599600 |
| H | -2.09928400 | 1.47452900  | -0.75470700 |
| H | -2.74022700 | -0.19281900 | -0.83086200 |
| H | 1.43360900  | 2.30987300  | -1.05339400 |
| H | 0.81065000  | 2.57736300  | 0.57349800  |
| O | 2.65946500  | 0.15910800  | 0.01195300  |
| H | -0.27887600 | 2.71175400  | -0.81942300 |
| C | -1.27797100 | 0.60619400  | 1.93041300  |
| H | -0.48411200 | 0.38374300  | 2.65406100  |
| H | -1.43595300 | 1.69094400  | 1.93651700  |
| H | -2.19920600 | 0.13483700  | 2.29602500  |

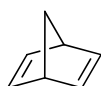

|   |             |             |             |
|---|-------------|-------------|-------------|
| C | 1.24590500  | 0.66762200  | -0.52068600 |
| C | 0.00000000  | 1.12267900  | 0.27150400  |
| C | 0.00000000  | -1.12267900 | 0.27150400  |
| C | 1.24530800  | -0.66827700 | -0.52052200 |
| H | 1.93709900  | 1.33834200  | -1.01901800 |
| H | 1.93619200  | -1.33915600 | -1.01926100 |
| C | 0.00000000  | 0.00000000  | 1.35500000  |
| H | -0.89992100 | 0.00011800  | 1.97913400  |
| H | 0.89992100  | -0.00011800 | 1.97913400  |
| C | -1.24530800 | 0.66827700  | -0.52052200 |
| H | -1.93619200 | 1.33915600  | -1.01926100 |
| C | -1.24590500 | -0.66762200 | -0.52068600 |
| H | -1.93709900 | -1.33834200 | -1.01901800 |
| H | -0.00001500 | 2.16005700  | 0.61237100  |
| H | 0.00001500  | -2.16005700 | 0.61237100  |

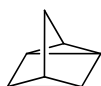

|   |             |             |             |
|---|-------------|-------------|-------------|
| C | 0.75759000  | 0.77511000  | -0.71060500 |
| C | 0.00000000  | 1.15217600  | 0.55114600  |
| C | 0.00000000  | -1.15217600 | 0.55114600  |
| C | 0.75759700  | -0.77511200 | -0.71060800 |
| H | 1.44997800  | 1.42738100  | -1.23098300 |
| H | 1.44996400  | -1.42738400 | -1.23101100 |
| C | 0.00000000  | 0.00000000  | 1.54099400  |
| H | -0.89128000 | -0.00000100 | 2.18154400  |
| H | 0.89128000  | 0.00000100  | 2.18154400  |
| C | -0.75759700 | 0.77511200  | -0.71060800 |
| H | -1.44996400 | 1.42738400  | -1.23101100 |
| C | -0.75759000 | -0.77511000 | -0.71060500 |
| H | -1.44997800 | -1.42738100 | -1.23098300 |
| H | 0.00000100  | 2.18810400  | 0.87787000  |
| H | -0.00000100 | -2.18810400 | 0.87787000  |

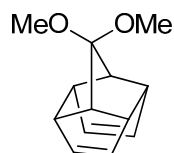

|   |             |             |             |
|---|-------------|-------------|-------------|
| C | -0.90325100 | -1.41396700 | 0.22646400  |
| C | 0.06373000  | -0.77795800 | -0.81444500 |
| C | 0.06374600  | 0.77795900  | 0.81441200  |
| C | -0.90349300 | -0.29512000 | 1.39838500  |
| H | -0.57272000 | -2.37813300 | 0.62273500  |
| H | -0.56438200 | -0.73160800 | 2.34061700  |
| C | 1.09188500  | 0.00000100  | -0.00002700 |
| C | -0.90355700 | 0.29511500  | -1.39840000 |
| H | -0.56449100 | 0.73159000  | -2.34065300 |
| C | -0.90325300 | 1.41397900  | -0.22649500 |
| H | -0.57275100 | 2.37814500  | -0.62280400 |
| H | 0.45624300  | -1.47144000 | -1.56244600 |
| H | 0.45628300  | 1.47144800  | 1.56239100  |
| O | 1.88844000  | -0.76538500 | 0.88410600  |
| O | 1.88855800  | 0.76527400  | -0.88409600 |
| C | 2.71482200  | -1.74253800 | 0.26202100  |
| C | 2.71482400  | 1.74259600  | -0.26202000 |
| H | 3.30975400  | -1.30769100 | -0.54942600 |
| H | 3.38271900  | -2.12242500 | 1.03948900  |
| H | 2.12495700  | -2.57905400 | -0.13757600 |
| H | 3.38349000  | 2.12171100  | -1.03920000 |
| H | 2.12489500  | 2.57956600  | 0.13649200  |
| H | 3.30893600  | 1.30811200  | 0.55021400  |
| C | -2.19361700 | -1.46777600 | -0.57076500 |
| C | -2.19427000 | -0.49699000 | -1.49093300 |
| C | -2.19361500 | 1.46775300  | 0.57073100  |
| C | -2.19416600 | 0.49703500  | 1.49103900  |
| H | -3.01109600 | -2.15020800 | -0.35657800 |
| H | -3.01281700 | -0.24834200 | -2.16030100 |
| H | -3.01109500 | 2.15020300  | 0.35659400  |
| H | -3.01261200 | 0.24847800  | 2.16056100  |

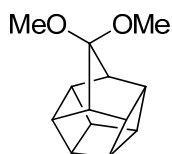

|   |             |             |             |
|---|-------------|-------------|-------------|
| C | 0.82267200  | 1.42917400  | -0.21661500 |
| C | -0.07026400 | 0.47913000  | -1.04758600 |
| C | -0.07026300 | -0.47919600 | 1.04757200  |
| C | 0.82194400  | 0.77332500  | 1.21925700  |
| H | 0.56532000  | 2.48934300  | -0.27207000 |
| H | 0.55677700  | 1.42185000  | 2.05585600  |
| C | -1.10973500 | -0.00003800 | -0.00001700 |
| C | 0.82197800  | -0.77336000 | -1.21927700 |
| H | 0.55686600  | -1.42188000 | -2.05589600 |
| C | 0.82270500  | -1.42923200 | 0.21662100  |
| H | 0.56539900  | -2.48941000 | 0.27207900  |
| H | -0.48662000 | 0.88690200  | -1.97197100 |
| H | -0.48666800 | -0.88697200 | 1.97193500  |
| O | -1.90741000 | 1.00822000  | 0.58607300  |
| O | -1.90743200 | -1.00825300 | -0.58606500 |
| C | -2.74915800 | 1.71886200  | -0.31376000 |
| C | -2.74935700 | -1.71873400 | 0.31375700  |
| H | -3.35346800 | 1.03764600  | -0.92385800 |
| H | -3.40746100 | 2.33678500  | 0.30236700  |
| H | -2.16979700 | 2.37340100  | -0.97953300 |
| H | -3.40754400 | -2.33673200 | -0.30241400 |
| H | -2.17009400 | -2.37319300 | 0.97969700  |
| H | -3.35372200 | -1.03739800 | 0.92364000  |
| C | 2.32046000  | 1.03371800  | -0.39041500 |
| C | 2.31984900  | -0.38275600 | -1.03619100 |
| C | 2.32046100  | -1.03367200 | 0.39038600  |
| C | 2.31981600  | 0.38276000  | 1.03627300  |
| H | 3.04651600  | 1.77928000  | -0.72258000 |
| H | 3.04501800  | -0.62015000 | -1.81799200 |
| H | 3.04658600  | -1.77917700 | 0.72254600  |
| H | 3.04497500  | 0.62009800  | 1.81809600  |

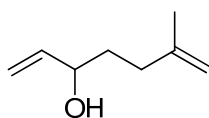

|   |             |             |             |
|---|-------------|-------------|-------------|
| C | -3.55250600 | 0.48945900  | -0.72240700 |
| C | -2.60013300 | -0.44324200 | -0.72590800 |
| H | -4.33859100 | 0.50558100  | -1.47174600 |
| H | -3.56629000 | 1.27665500  | 0.02646300  |
| H | -2.59468000 | -1.21598900 | -1.49557200 |
| C | -1.47305600 | -0.52951200 | 0.27813300  |
| H | -1.40976400 | -1.57595000 | 0.63078500  |
| C | -0.12378400 | -0.16499600 | -0.35794100 |
| H | 0.01450000  | -0.76775700 | -1.26465900 |
| H | -0.18276600 | 0.88300200  | -0.67440500 |
| C | 1.06868500  | -0.38444400 | 0.59385400  |
| H | 0.89815400  | 0.21538700  | 1.49706000  |
| H | 1.08250700  | -1.43623700 | 0.90808800  |
| C | 2.40696500  | -0.02580900 | -0.01783500 |
| C | 3.31594500  | -0.96240200 | -0.30956500 |

|   |             |             |             |
|---|-------------|-------------|-------------|
| H | 4.27828300  | -0.71075600 | -0.74919700 |
| H | 3.13283200  | -2.01692800 | -0.11613300 |
| C | 2.66786800  | 1.43956000  | -0.27388800 |
| H | 2.57594100  | 2.02084900  | 0.65388200  |
| H | 3.66934500  | 1.60485300  | -0.68294600 |
| H | 1.94192600  | 1.86452800  | -0.97937900 |
| O | -1.65788000 | 0.34256500  | 1.39007400  |
| H | -2.49826000 | 0.10056000  | 1.81050400  |

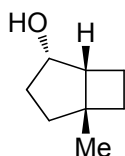

|   |             |             |             |
|---|-------------|-------------|-------------|
| C | 1.35635300  | -0.35600300 | -0.51657800 |
| C | 0.14554600  | 0.58445900  | -0.70147700 |
| C | -1.08665200 | -0.15653900 | -0.05268000 |
| C | -0.52505600 | -1.49369000 | 0.48187000  |
| H | 0.02579900  | 0.90482600  | -1.74333200 |
| C | -1.16247300 | 0.97544000  | 1.02497600  |
| C | 0.02134800  | 1.71997500  | 0.34994900  |
| H | -0.97025400 | 0.63843300  | 2.04998500  |
| H | -0.24664800 | 2.69194700  | -0.07585800 |
| H | 0.91467000  | 1.85226700  | 0.96712200  |
| H | -2.10955000 | 1.52577400  | 1.02370200  |
| H | -1.02879500 | -1.81871600 | 1.40043000  |
| H | -0.68019600 | -2.28383100 | -0.26636600 |
| H | 1.17501300  | -0.69258900 | 1.60053400  |
| H | 1.57532500  | -2.16591400 | 0.71452700  |
| H | 1.44687500  | -0.98765900 | -1.41689200 |
| C | 0.98030900  | -1.24795400 | 0.67417800  |
| O | 2.59779900  | 0.29104900  | -0.25425100 |
| H | 2.81644000  | 0.83435700  | -1.02736300 |
| C | -2.34314100 | -0.31691800 | -0.89967400 |
| H | -3.16341100 | -0.74645400 | -0.30917000 |
| H | -2.68905300 | 0.64773200  | -1.29127900 |
| H | -2.16601000 | -0.98117600 | -1.75542100 |

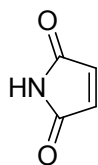

|   |             |             |             |
|---|-------------|-------------|-------------|
| C | -0.00028500 | -0.15706000 | 1.15773500  |
| C | 0.00100900  | 1.26545400  | 0.66861300  |
| C | 0.00100900  | 1.26545400  | -0.66861300 |
| C | -0.00028500 | -0.15706000 | -1.15773500 |
| H | 0.00208300  | 2.10219900  | -1.35548900 |
| H | 0.00208300  | 2.10219900  | 1.35548900  |
| O | -0.00028500 | -0.56083200 | 2.30013900  |
| O | -0.00028500 | -0.56083200 | -2.30013900 |
| N | -0.00085500 | -0.94015400 | 0.00000000  |
| H | -0.00231600 | -1.95074700 | 0.00000000  |

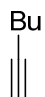

|   |             |             |             |
|---|-------------|-------------|-------------|
| C | -2.15358900 | 0.05954100  | -0.00293000 |
| C | -0.85265000 | 0.73008100  | -0.00021900 |
| H | -0.78148400 | 1.39078100  | -0.87607200 |
| H | -0.78359400 | 1.38593300  | 0.87942600  |
| C | -3.22116200 | -0.50526400 | 0.00188300  |
| H | -4.16287800 | -1.00495300 | 0.00451100  |
| C | 0.33917200  | -0.25056100 | -0.00162200 |
| H | 0.26266000  | -0.90635800 | 0.87536700  |
| H | 0.26444200  | -0.90179900 | -0.88215900 |
| C | 1.69305000  | 0.46850000  | 0.00158200  |
| H | 1.75398300  | 1.12420800  | 0.88191300  |
| H | 1.75568400  | 1.12890300  | -0.87511000 |
| C | 2.88234800  | -0.49724100 | 0.00012200  |
| H | 3.83540200  | 0.04356600  | 0.00246500  |
| H | 2.86554000  | -1.14766100 | 0.88311400  |
| H | 2.86722300  | -1.14295700 | -0.88635000 |

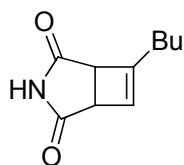

|   |             |             |             |
|---|-------------|-------------|-------------|
| C | -1.36840300 | 1.37207300  | 0.09804300  |
| C | -0.71149000 | 0.17028200  | 0.76573200  |
| C | -1.78078100 | -0.96474800 | 0.73029800  |
| C | -3.00482300 | -0.34472300 | 0.06171800  |
| O | -0.89177100 | 2.46523300  | -0.12017800 |
| O | -4.07715400 | -0.85509200 | -0.17491400 |
| N | -2.65657600 | 0.97119800  | -0.26345500 |
| H | -3.28260200 | 1.57899400  | -0.78067900 |
| H | -0.25821300 | 0.43498100  | 1.72532600  |
| H | -2.04414400 | -1.46669200 | 1.66586600  |
| C | -0.81926200 | -1.68451200 | -0.21210800 |
| C | 0.10857200  | -0.71313900 | -0.18970000 |
| H | -0.90468700 | -2.63392700 | -0.73221700 |
| C | 1.43154500  | -0.46724100 | -0.83358000 |
| H | 1.65816000  | -1.29419000 | -1.51934400 |
| H | 1.36301800  | 0.44468200  | -1.44552400 |
| C | 2.58241100  | -0.29307000 | 0.17828300  |
| H | 2.34323600  | 0.53712600  | 0.85708300  |
| H | 2.65547600  | -1.19456400 | 0.80235400  |
| C | 3.93246700  | -0.02267400 | -0.49716500 |
| H | 4.16946500  | -0.85188700 | -1.17867300 |
| H | 3.84787600  | 0.87490800  | -1.12562200 |
| C | 5.07682300  | 0.15955400  | 0.50501400  |
| H | 4.88394100  | 1.00475000  | 1.17684700  |
| H | 5.20646300  | -0.73507500 | 1.12633300  |
| H | 6.02708100  | 0.35055800  | -0.00604300 |

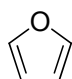



|   |             |             |             |
|---|-------------|-------------|-------------|
| C | 1.09501500  | -0.34743500 | 0.00051100  |
| C | 0.71791100  | 0.95993700  | -0.00029100 |
| C | -0.71802100 | 0.95986000  | 0.00005700  |
| C | -1.09497300 | -0.34755600 | 0.00027600  |
| O | 0.00006500  | -1.16096700 | -0.00052300 |
| H | 2.05026900  | -0.84991500 | 0.00084200  |
| H | 1.37359800  | 1.81954700  | -0.00052300 |
| H | -1.37380400 | 1.81939700  | 0.00009600  |
| H | -2.05017600 | -0.85013300 | 0.00044800  |

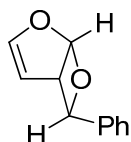

|   |             |             |             |
|---|-------------|-------------|-------------|
| C | 1.87793300  | -0.91078600 | 0.33859700  |
| C | 1.33787500  | 0.50710900  | 0.64199700  |
| C | 2.54755300  | 1.35630800  | 0.35907700  |
| C | 3.55335300  | 0.54961600  | 0.00815400  |
| O | 3.27011200  | -0.79697500 | 0.04033600  |
| H | 0.83457800  | 0.69745200  | 1.59374900  |
| H | 2.58998500  | 2.43584000  | 0.41447100  |
| H | 4.57223900  | 0.78259800  | -0.27596400 |
| H | 1.76423500  | -1.75262500 | 1.02583700  |
| C | 0.39307500  | 0.23585900  | -0.57601200 |
| H | 0.56958500  | 0.91755300  | -1.41674000 |
| C | -1.08371300 | 0.11318300  | -0.29718900 |
| C | -1.67085100 | -1.11858800 | 0.00935700  |
| C | -1.88465400 | 1.26330900  | -0.31702100 |
| C | -3.03458300 | -1.19760800 | 0.29840800  |
| H | -1.05551600 | -2.01236900 | -0.00267300 |
| C | -3.24459000 | 1.18600900  | -0.02029000 |
| H | -1.44077300 | 2.22464200  | -0.56921800 |
| C | -3.82407400 | -0.04704000 | 0.28929800  |
| H | -3.48086100 | -2.16189600 | 0.52758900  |
| H | -3.85385400 | 2.08590600  | -0.03908100 |
| H | -4.88534700 | -0.10991800 | 0.51450300  |
| O | 1.05261100  | -1.04445100 | -0.81267700 |

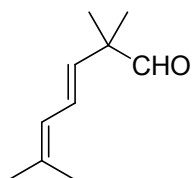

|   |             |             |             |
|---|-------------|-------------|-------------|
| C | 2.59009300  | -0.38318300 | -1.04801600 |
| O | 3.49957800  | -1.18074800 | -1.08041200 |
| H | 2.08459700  | -0.05064000 | -1.98384100 |
| C | 1.99042700  | 0.23352300  | 0.22556800  |
| C | 0.62627800  | -0.42088300 | 0.35051100  |
| C | -0.57253200 | 0.13170600  | 0.08225400  |
| H | 0.65792900  | -1.46575700 | 0.66378900  |
| H | -0.61785300 | 1.16998600  | -0.23612900 |
| C | -1.82771200 | -0.59065200 | 0.21059300  |
| C | -3.07461200 | -0.12587500 | -0.02210100 |

|   |             |             |             |
|---|-------------|-------------|-------------|
| H | -1.73133800 | -1.62844700 | 0.53174600  |
| C | 2.86285000  | -0.11733700 | 1.44179600  |
| C | 1.91248800  | 1.75679700  | 0.01758600  |
| H | 3.87829000  | 0.27255600  | 1.31577500  |
| H | 2.43344400  | 0.31041800  | 2.35397800  |
| H | 2.94073700  | -1.20118700 | 1.56841700  |
| H | 1.39715000  | 2.01746200  | -0.91425600 |
| H | 1.37256300  | 2.22809900  | 0.84587300  |
| H | 2.91796000  | 2.18971200  | -0.02534200 |
| C | -3.40120000 | 1.27584500  | -0.47009800 |
| C | -4.27268000 | -1.02313600 | 0.15904500  |
| H | -2.52235300 | 1.91219300  | -0.59468500 |
| H | -3.94129200 | 1.25875300  | -1.42706000 |
| H | -4.06943700 | 1.76504000  | 0.25236200  |
| H | -3.98728400 | -2.02798600 | 0.48505200  |
| H | -4.96873200 | -0.60807900 | 0.90201800  |
| H | -4.84140700 | -1.11696700 | -0.77722800 |

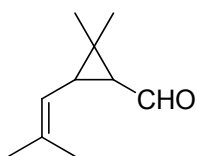

|   |             |             |             |
|---|-------------|-------------|-------------|
| C | -0.05305500 | 0.02072400  | 0.25766500  |
| C | -1.32599100 | -0.39076500 | -0.52306800 |
| C | -1.19391500 | 0.99842500  | 0.10551900  |
| H | 0.00212700  | -0.42547900 | 1.24828500  |
| H | -1.23116000 | -0.43417400 | -1.60572900 |
| C | 1.23817200  | 0.12938300  | -0.45728900 |
| C | 2.45811000  | -0.20138400 | 0.00117900  |
| H | 1.17897000  | 0.51476500  | -1.47414100 |
| C | 3.67664800  | -0.02769200 | -0.87332500 |
| C | 2.74964400  | -0.75775100 | 1.37284800  |
| C | -1.07806500 | 2.16423800  | -0.86424500 |
| C | -1.99586500 | 1.34791400  | 1.35173600  |
| C | -2.18952300 | -1.45837700 | 0.02351400  |
| H | -2.07526800 | 2.52893500  | -1.13876500 |
| H | -0.53174300 | 2.99640800  | -0.40281400 |
| H | -0.55972100 | 1.89446600  | -1.78843900 |
| H | 3.42145500  | 0.37786000  | -1.85740000 |
| H | 4.40639300  | 0.64857200  | -0.40577600 |
| H | 4.19459900  | -0.98539800 | -1.02440000 |
| H | 3.24522400  | -1.73532500 | 1.29504500  |
| H | 3.44408400  | -0.10138600 | 1.91566300  |
| H | 1.85999200  | -0.88498800 | 1.99392700  |
| H | -2.01413800 | 0.53653200  | 2.08540800  |
| H | -1.55621200 | 2.22504500  | 1.84266100  |
| H | -3.03404900 | 1.59454300  | 1.09670700  |
| H | -2.26736400 | -1.49585000 | 1.13357600  |
| O | -2.77501800 | -2.27535200 | -0.66012600 |

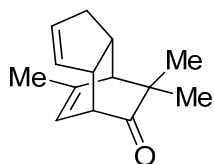

|   |             |             |             |
|---|-------------|-------------|-------------|
| C | -0.31017800 | 0.61788900  | -1.56952200 |
| C | -0.04214300 | -0.84326900 | -1.28357700 |
| C | 0.19109400  | 0.72108900  | 0.76928600  |
| C | -0.19413200 | 1.44133400  | -0.51736700 |
| C | 1.37476600  | -0.90611000 | -0.70617700 |
| C | 1.56317700  | 0.00105000  | 0.53191200  |
| H | 0.28296000  | 1.41962500  | 1.61066000  |
| H | -0.10667000 | -1.48322400 | -2.16662500 |
| C | -0.91382400 | -0.33687100 | 1.06950200  |
| H | -0.63773700 | -0.88445300 | 1.97407700  |
| C | -1.00497500 | -1.32967800 | -0.14051900 |
| H | -0.69145000 | -2.34368900 | 0.14544100  |
| H | -0.56758100 | 0.95322300  | -2.57085900 |
| C | 2.01315700  | -0.87783500 | 1.71839800  |
| C | 2.68721100  | 1.01798600  | 0.24238100  |
| H | 2.98106700  | -1.33251900 | 1.48686900  |
| H | 2.12363200  | -0.26941700 | 2.62441000  |
| H | 1.31551100  | -1.69131900 | 1.93837800  |
| H | 3.60424800  | 0.48789200  | -0.03226800 |
| H | 2.42764700  | 1.68943900  | -0.58136500 |
| H | 2.89169400  | 1.62469900  | 1.13321900  |
| O | 2.26295300  | -1.60203900 | -1.15746000 |
| C | -0.40168700 | 2.92738100  | -0.54564900 |
| H | 0.50925000  | 3.46209800  | -0.24276700 |
| H | -0.68373800 | 3.27548100  | -1.54494000 |
| H | -1.18865600 | 3.23556600  | 0.15656200  |
| C | -2.34695600 | 0.24886400  | 1.25941300  |
| C | -3.17845100 | -0.46170900 | 0.22076200  |
| C | -2.46335700 | -1.30770300 | -0.52301700 |
| H | -2.37812100 | 1.33831000  | 1.11913900  |
| H | -2.72463700 | 0.06598300  | 2.27516000  |
| H | -4.24573300 | -0.28614500 | 0.11020100  |
| H | -2.85751700 | -1.91974000 | -1.33057300 |

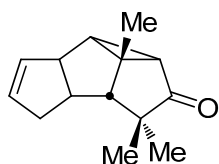

|   |             |             |             |
|---|-------------|-------------|-------------|
| C | -1.56571500 | -0.60118300 | -0.41663100 |
| C | -1.72910300 | 0.11258200  | 0.94145500  |
| C | -0.78153900 | 1.26648000  | 0.99328300  |
| C | 0.04466600  | 1.28890000  | -0.28538600 |
| C | -0.16282300 | -0.12830400 | -0.91728400 |
| H | -1.12378200 | 2.16932900  | 1.49270300  |
| H | -0.15020700 | -0.08783000 | -2.01249100 |
| C | -2.65516700 | 0.00042700  | -1.33959600 |
| C | -1.79645900 | -2.11065800 | -0.28944100 |
| H | -2.53825600 | 1.08371700  | -1.45583000 |
| H | -2.59540800 | -0.45477400 | -2.33576900 |

|   |             |             |             |
|---|-------------|-------------|-------------|
| H | -3.65263500 | -0.19083600 | -0.93054800 |
| H | -2.81602000 | -2.29324500 | 0.06417100  |
| H | -1.67016600 | -2.61459400 | -1.25526000 |
| H | -1.12002100 | -2.57774100 | 0.43260900  |
| O | -2.56328200 | -0.17025300 | 1.77993700  |
| C | 0.73425600  | 1.01851500  | 1.01778800  |
| C | 1.01846000  | -0.96393200 | -0.37501000 |
| C | 0.25122200  | 2.52205600  | -1.13167800 |
| H | 0.38980600  | 3.40933800  | -0.50312300 |
| H | 1.14064300  | 2.42412400  | -1.76698100 |
| H | -0.60645400 | 2.71139900  | -1.78903600 |
| C | 1.32426800  | -0.39908200 | 1.05244500  |
| H | 0.88267400  | -0.99956300 | 1.85894100  |
| H | 0.77951100  | -2.02929700 | -0.33144300 |
| H | 1.29711300  | 1.81329900  | 1.50324600  |
| C | 2.83558400  | -0.38332000 | 1.11259700  |
| C | 2.35351400  | -0.80192900 | -1.16354100 |
| H | 2.56443000  | -1.67835700 | -1.79017800 |
| H | 2.32728300  | 0.06017500  | -1.84744100 |
| C | 3.38878100  | -0.59120900 | -0.08448600 |
| H | 4.45635100  | -0.58360300 | -0.28943900 |
| H | 3.38172700  | -0.17556600 | 2.02928100  |

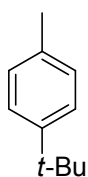

|   |             |             |             |
|---|-------------|-------------|-------------|
| C | 0.36303900  | 1.21791600  | -0.00254500 |
| C | 1.76082000  | 1.20458700  | -0.00731200 |
| C | 2.47770300  | 0.00623100  | -0.00714100 |
| C | 1.73925400  | -1.18560900 | -0.00738100 |
| C | 0.34789200  | -1.17185000 | -0.00297400 |
| C | -0.37988800 | 0.03144800  | 0.00025200  |
| H | -0.14130900 | 2.17819600  | -0.00422300 |
| H | 2.29962900  | 2.15002800  | -0.01238400 |
| H | 2.26272300  | -2.13987700 | -0.01266100 |
| H | -0.17942900 | -2.12230600 | -0.00539100 |
| C | 3.98839200  | -0.01217900 | 0.01073900  |
| C | -1.91924300 | 0.00306400  | 0.00187200  |
| H | 4.40339600  | 0.96603800  | -0.25326300 |
| H | 4.37457500  | -0.27498200 | 1.00470700  |
| H | 4.39014500  | -0.74949400 | -0.69419600 |
| C | -2.42333600 | -0.72876700 | -1.26467300 |
| C | -2.53138000 | 1.41674900  | 0.01262600  |
| C | -2.42074700 | -0.74642800 | 1.25904600  |
| H | -2.24147100 | 1.99415500  | -0.87268400 |
| H | -3.62491600 | 1.34474700  | 0.01629000  |
| H | -2.23435100 | 1.98328800  | 0.90260600  |
| H | -2.08682400 | -0.24348900 | 2.17378700  |
| H | -3.51716400 | -0.78275000 | 1.27143300  |
| H | -2.05343400 | -1.77746800 | 1.29256900  |
| H | -2.05555700 | -1.75904100 | -1.31332300 |
| H | -3.51979300 | -0.76514100 | -1.27548200 |
| H | -2.09124700 | -0.21287400 | -2.17284300 |

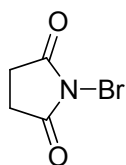

|    |             |             |             |
|----|-------------|-------------|-------------|
| C  | 0.91538800  | -1.19119600 | -0.00002000 |
| C  | 2.38284400  | -0.76832600 | 0.00066700  |
| C  | 2.38170500  | 0.77113700  | 0.00025300  |
| C  | 0.91322200  | 1.19145700  | -0.00002300 |
| H  | 2.86605100  | -1.20214400 | 0.88133600  |
| H  | 2.86464700  | 1.20564800  | -0.88020700 |
| H  | 2.86700300  | -1.20276400 | -0.87918000 |
| H  | 2.86470400  | 1.20615600  | 0.88040700  |
| O  | 0.46211600  | -2.30806700 | -0.00154200 |
| O  | 0.45849200  | 2.30767800  | -0.00136300 |
| N  | 0.16662000  | -0.00042900 | 0.00140700  |
| Br | -1.70150200 | -0.00054900 | 0.00016500  |

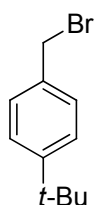

|    |             |             |             |
|----|-------------|-------------|-------------|
| C  | -1.14619000 | 1.25356200  | -0.19282100 |
| C  | 0.21265300  | 1.28361000  | -0.50760000 |
| C  | 0.91776700  | 0.10410100  | -0.76539700 |
| C  | 0.21985500  | -1.10995800 | -0.69513300 |
| C  | -1.13397400 | -1.13471200 | -0.38040000 |
| C  | -1.85367700 | 0.04565300  | -0.12028900 |
| H  | -1.65139300 | 2.19412200  | -0.00456000 |
| H  | 0.72995500  | 2.23940100  | -0.55178300 |
| H  | 0.74477000  | -2.04314400 | -0.88642500 |
| H  | -1.63940100 | -2.09543200 | -0.33905800 |
| C  | 2.36445600  | 0.13760700  | -1.12270400 |
| C  | -3.35228100 | -0.02731100 | 0.22253100  |
| H  | 2.67096100  | 1.08592400  | -1.56161200 |
| H  | 2.66176900  | -0.68650900 | -1.76973100 |
| C  | -3.54599700 | -0.87873800 | 1.50004800  |
| C  | -3.96383900 | 1.36353700  | 0.47648900  |
| C  | -4.11638200 | -0.68344300 | -0.95229900 |
| H  | -3.48466000 | 1.87237100  | 1.32059500  |
| H  | -5.02799200 | 1.25954500  | 0.71586100  |
| H  | -3.88590100 | 2.01153200  | -0.40394300 |
| H  | -4.00345900 | -0.09569200 | -1.87041900 |
| H  | -5.18629900 | -0.75024900 | -0.72048700 |
| H  | -3.75674500 | -1.69708800 | -1.15821000 |
| H  | -3.17185200 | -1.89969700 | 1.37153900  |
| H  | -4.61060500 | -0.94356300 | 1.75593400  |
| H  | -3.01813500 | -0.43414700 | 2.35128400  |
| Br | 3.57184700  | -0.06116600 | 0.48504200  |

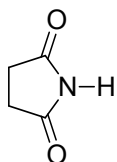

|   |             |             |             |
|---|-------------|-------------|-------------|
| C | 0.00000600  | -0.21466500 | 1.17834200  |
| C | 0.00000600  | 1.25975000  | 0.76974100  |
| C | 0.00000600  | 1.25975000  | -0.76974100 |
| C | 0.00000600  | -0.21466500 | -1.17834200 |
| H | -0.87937500 | 1.74379900  | -1.20568900 |
| H | -0.87937500 | 1.74379900  | 1.20568900  |
| O | 0.00001000  | -0.67695500 | 2.29689700  |
| O | 0.00001000  | -0.67695500 | -2.29689700 |
| N | -0.00003200 | -0.95897500 | 0.00000000  |
| H | 0.00012700  | -1.97232700 | 0.00000000  |
| H | 0.87927200  | 1.74390600  | 1.20576900  |
| H | 0.87927200  | 1.74390600  | -1.20576900 |

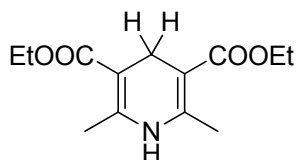

|   |             |             |             |
|---|-------------|-------------|-------------|
| C | -1.23290200 | 1.28766900  | -0.00038300 |
| C | -1.27179000 | -0.07108100 | -0.00045500 |
| C | -0.00001500 | -0.90548700 | -0.00075800 |
| C | 1.27178100  | -0.07111900 | -0.00037200 |
| C | 1.23293900  | 1.28762700  | -0.00029800 |
| N | 0.00002900  | 1.92662300  | -0.00049600 |
| H | -0.00009900 | -1.58548100 | 0.86165800  |
| C | 2.40134600  | 2.24538900  | 0.00010700  |
| C | -2.40124500 | 2.24550100  | -0.00023300 |
| C | -2.49794000 | -0.88182100 | -0.00013200 |
| C | 2.49792900  | -0.88185900 | -0.00029100 |
| H | 3.03609900  | 2.09474300  | -0.87587500 |
| H | 2.05117900  | 3.28392700  | -0.00044500 |
| H | 3.03502300  | 2.09530300  | 0.87697800  |
| H | -3.03493600 | 2.09570800  | 0.87668300  |
| H | -2.05099800 | 3.28401200  | -0.00106900 |
| H | -3.03599600 | 2.09465700  | -0.87617500 |
| H | 0.00004600  | -1.58485000 | -0.86367800 |
| O | 2.48362400  | -2.10196900 | -0.00067200 |
| O | -2.48361000 | -2.10192400 | -0.00029600 |
| O | -3.66648000 | -0.17626900 | 0.00055400  |
| O | 3.66643500  | -0.17627100 | 0.00034100  |
| C | 4.86670100  | -0.97636600 | 0.00025000  |
| C | -4.86673400 | -0.97635700 | 0.00092100  |
| H | -4.86263200 | -1.62498400 | 0.88300000  |
| H | -4.86262900 | -1.62592300 | -0.88045600 |
| H | 4.86287400  | -1.62500000 | -0.88181700 |
| H | 4.86232800  | -1.62591000 | 0.88164300  |
| C | 6.05080200  | -0.02668800 | 0.00106600  |
| C | -6.05087600 | -0.02671600 | 0.00043400  |
| H | -6.98590500 | -0.59765200 | 0.00075800  |
| H | -6.04084600 | 0.61486600  | 0.88792300  |

|   |             |             |             |
|---|-------------|-------------|-------------|
| H | -6.04085200 | 0.61383400  | -0.88780900 |
| H | 6.98584500  | -0.59759900 | 0.00129300  |
| H | 6.04113700  | 0.61462400  | -0.88662900 |
| H | 6.04038700  | 0.61412900  | 0.88910300  |
| H | 0.00004400  | 2.93456200  | -0.00016300 |

H<sub>2</sub>

|   |            |            |             |
|---|------------|------------|-------------|
| H | 0.00000000 | 0.00000000 | 0.37139400  |
| H | 0.00000000 | 0.00000000 | -0.37139400 |

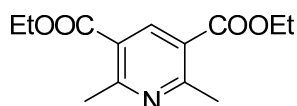

|   |             |             |             |
|---|-------------|-------------|-------------|
| C | 1.17314800  | 1.38206600  | 0.00017200  |
| C | 1.21711900  | -0.03241100 | 0.00009200  |
| C | -0.00000300 | -0.71360800 | -0.00001600 |
| C | -1.21712200 | -0.03240700 | -0.00006800 |
| C | -1.17314600 | 1.38207100  | -0.00015300 |
| N | 0.00000300  | 2.03480400  | -0.00003000 |
| C | -2.38229300 | 2.28405900  | -0.00051200 |
| C | 2.38230500  | 2.28404200  | 0.00039000  |
| C | 2.43709500  | -0.89903100 | 0.00007800  |
| C | -2.43709800 | -0.89902900 | -0.00009900 |
| H | -3.01285800 | 2.10756800  | 0.87625000  |
| H | -2.03706300 | 3.31937200  | -0.00115800 |
| H | -3.01317500 | 2.10654000  | -0.87683300 |
| H | 3.01314900  | 2.10707500  | -0.87606900 |
| H | 2.03708600  | 3.31935900  | 0.00040000  |
| H | 3.01290200  | 2.10698300  | 0.87701500  |
| O | -2.39166400 | -2.11428000 | -0.00047300 |
| O | 2.39166200  | -2.11428000 | 0.00004600  |
| O | 3.59935300  | -0.21233500 | 0.00009000  |
| O | -3.59935600 | -0.21233800 | 0.00038600  |
| C | -4.80136500 | -1.01960600 | 0.00033300  |
| C | 4.80135900  | -1.01960400 | 0.00007700  |
| H | 4.78817400  | -1.66666200 | -0.88246500 |
| H | 4.78847300  | -1.66622800 | 0.88295000  |
| H | -4.78845500 | -1.66629100 | 0.88316400  |
| H | -4.78820600 | -1.66660400 | -0.88225200 |
| C | -5.98730400 | -0.07387400 | 0.00003700  |
| C | 5.98730200  | -0.07387400 | -0.00030400 |
| H | 6.91887700  | -0.65012200 | -0.00031400 |
| H | 5.97959000  | 0.56637900  | -0.88831500 |
| H | 5.97984600  | 0.56673600  | 0.88745700  |
| H | -6.91888400 | -0.65011200 | 0.00000000  |
| H | -5.97982900 | 0.56669800  | 0.88782500  |
| H | -5.97958900 | 0.56642700  | -0.88794300 |
| H | -0.00000500 | -1.79763800 | -0.00007400 |

CH<sub>4</sub>

|   |            |            |            |
|---|------------|------------|------------|
| C | 0.00000000 | 0.00000000 | 0.00000000 |
| H | 0.63133900 | 0.63133900 | 0.63133900 |

|                 |             |             |             |
|-----------------|-------------|-------------|-------------|
| H               | -0.63133900 | -0.63133900 | 0.63133900  |
| H               | -0.63133900 | 0.63133900  | -0.63133900 |
| H               | 0.63133900  | -0.63133900 | -0.63133900 |
| CO <sub>2</sub> |             |             |             |
| C               | 0.00000000  | 0.00000000  | 0.00000000  |
| O               | 0.00000000  | 0.00000000  | 1.16915600  |
| O               | 0.00000000  | 0.00000000  | -1.16915600 |

## References

1. Frisch, M.J.; Trucks, G.W.; Schlegel, H.B.; Scuseria, G.E.; Robb, M.A.; Cheeseman, J.R.; Scalmani, G.; Barone, V.; Mennucci, B.; Petersson, G.A.; *et al.* *Gaussian 09, Version D.01*; Gaussian, Inc.: Wallingford, CT, USA, 2009.
2. Becke, A.D. Density-Functional Thermochemistry. III. The Role of Exact Exchange. *J. Chem. Phys.* **1993**, *98*, 5648–5652.
3. Lee, C.; Yang, W.; Parr, R.G. Development of the Colle-Salvetti Correlation-Energy Formula into a Functional of the Electron Density. *Phys. Rev. B* **1988**, *37*, 785–789.
4. Vosko, S.H.; Wilk, L.; Nusair, M. Accurate Spin-Dependent Electron Liquid Correlation Energies for Local Spin Density Calculations: A Critical Analysis. *Can. J. Phys.* **1980**, *58*, 1200–1211.
5. Stephens, P.J.; Devlin, F.J.; Chabalowski, C.F.; Frisch, M.J. Ab Initio Calculation of Vibrational Absorption and Circular Dichroism Spectra Using Density Functional Force Fields. *J. Phys. Chem.* **1994**, *98*, 11623–11627.
6. Baboul, A.G.; Curtiss, L.A.; Redfern, P.C.; Raghavachari, K. Gaussian-3 theory using density functional geometries and zero-point energies. *J. Chem. Phys.* **1999**, *110*, 7650–7657.
